# Supplementary material
Source: publisher figshare collection journal article supplement (https://acs.figshare.com/ndownloader/files/4164826)

# Supporting Information

## Intensified Azeotropic Distillation: a Strategy for Optimising Direct Amidation

*Christophe Grosjean<sup>\*†</sup>, Julie Parker<sup>‡</sup>, Carl Thirsk<sup>†</sup> and Allen R. Wright<sup>‡</sup>*

LyraChem Ltd, St Thomas Street Stables, St Thomas Street, Newcastle-upon-Tyne, NE1 4LE, UK

E-mail: christophe.grosjean@lyrachem.com

<sup>†</sup> LyraChem Ltd

<sup>‡</sup>School of Chemical Engineering and Advanced Materials, Merz Court, Newcastle University,  
Newcastle-upon-Tyne, NE1 7RU, UK

### Table of Content

#### ***N*-4-phenylbutyl-phenylacetamide characterization data**

- <sup>1</sup>H NMR spectrum
- <sup>13</sup>C NMR spectrum
- GC chromatogram
- Electrospray MS results

#### **Productivity Calculations for a Train of CSTR's and a Batch Reactor**

<sup>1</sup>H NMR spectrum

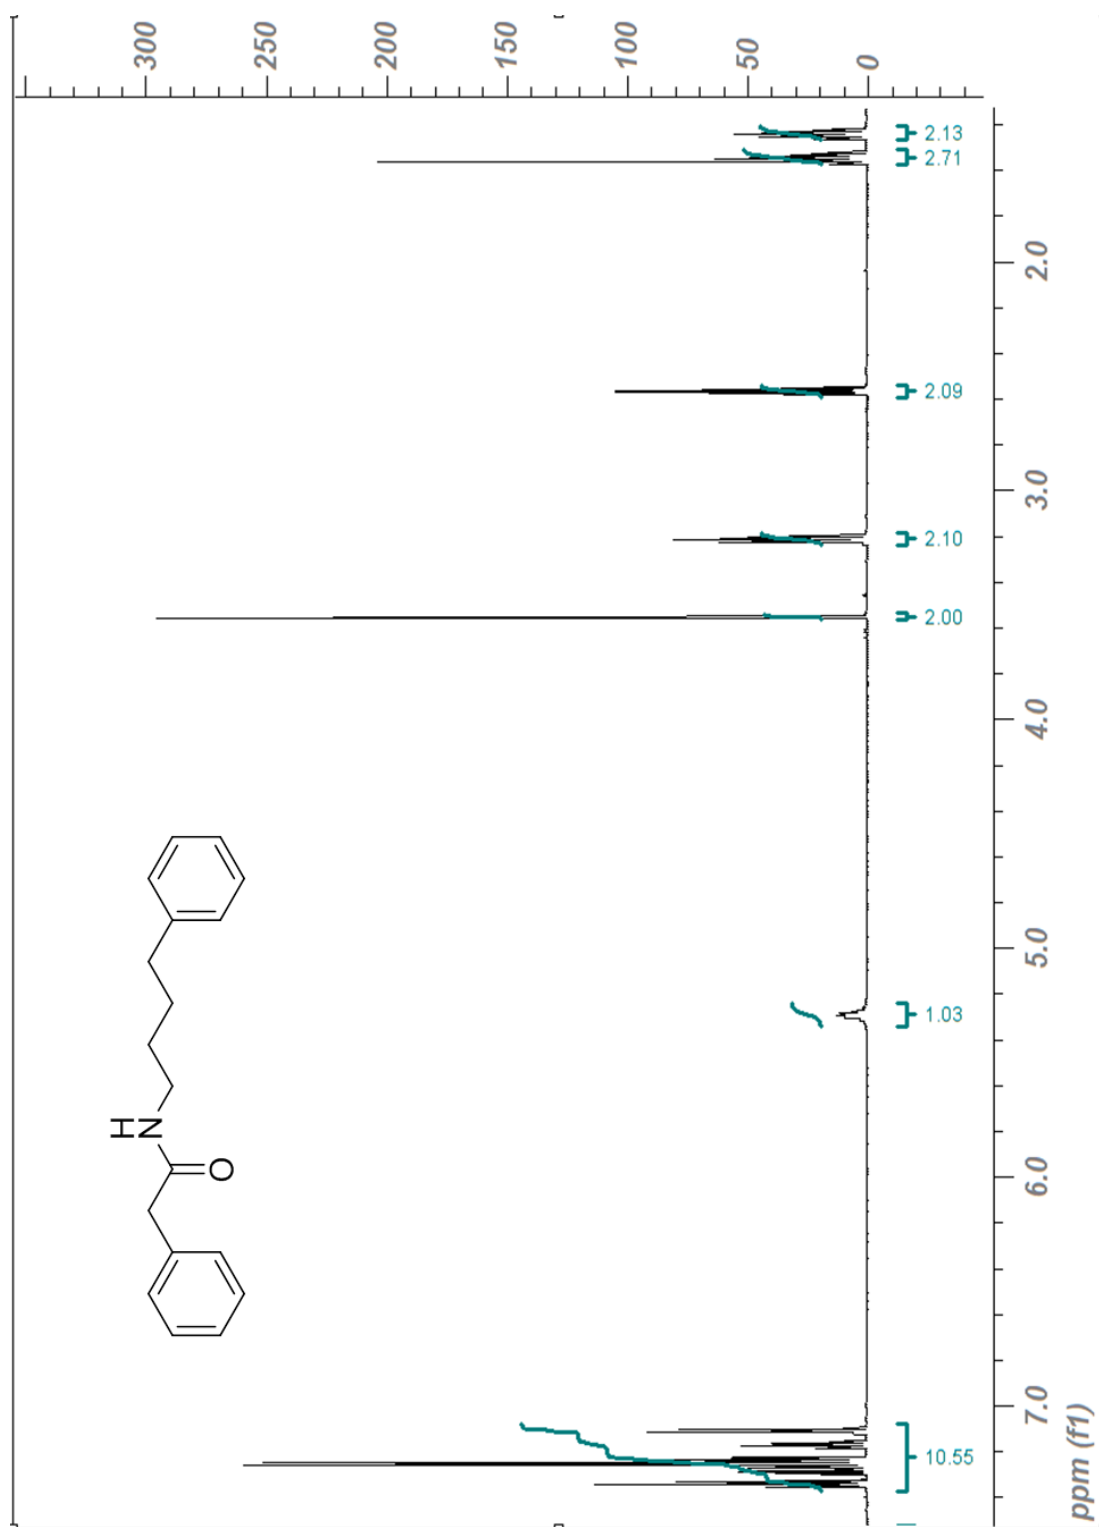

$^{13}\text{C}$  NMR spectrum

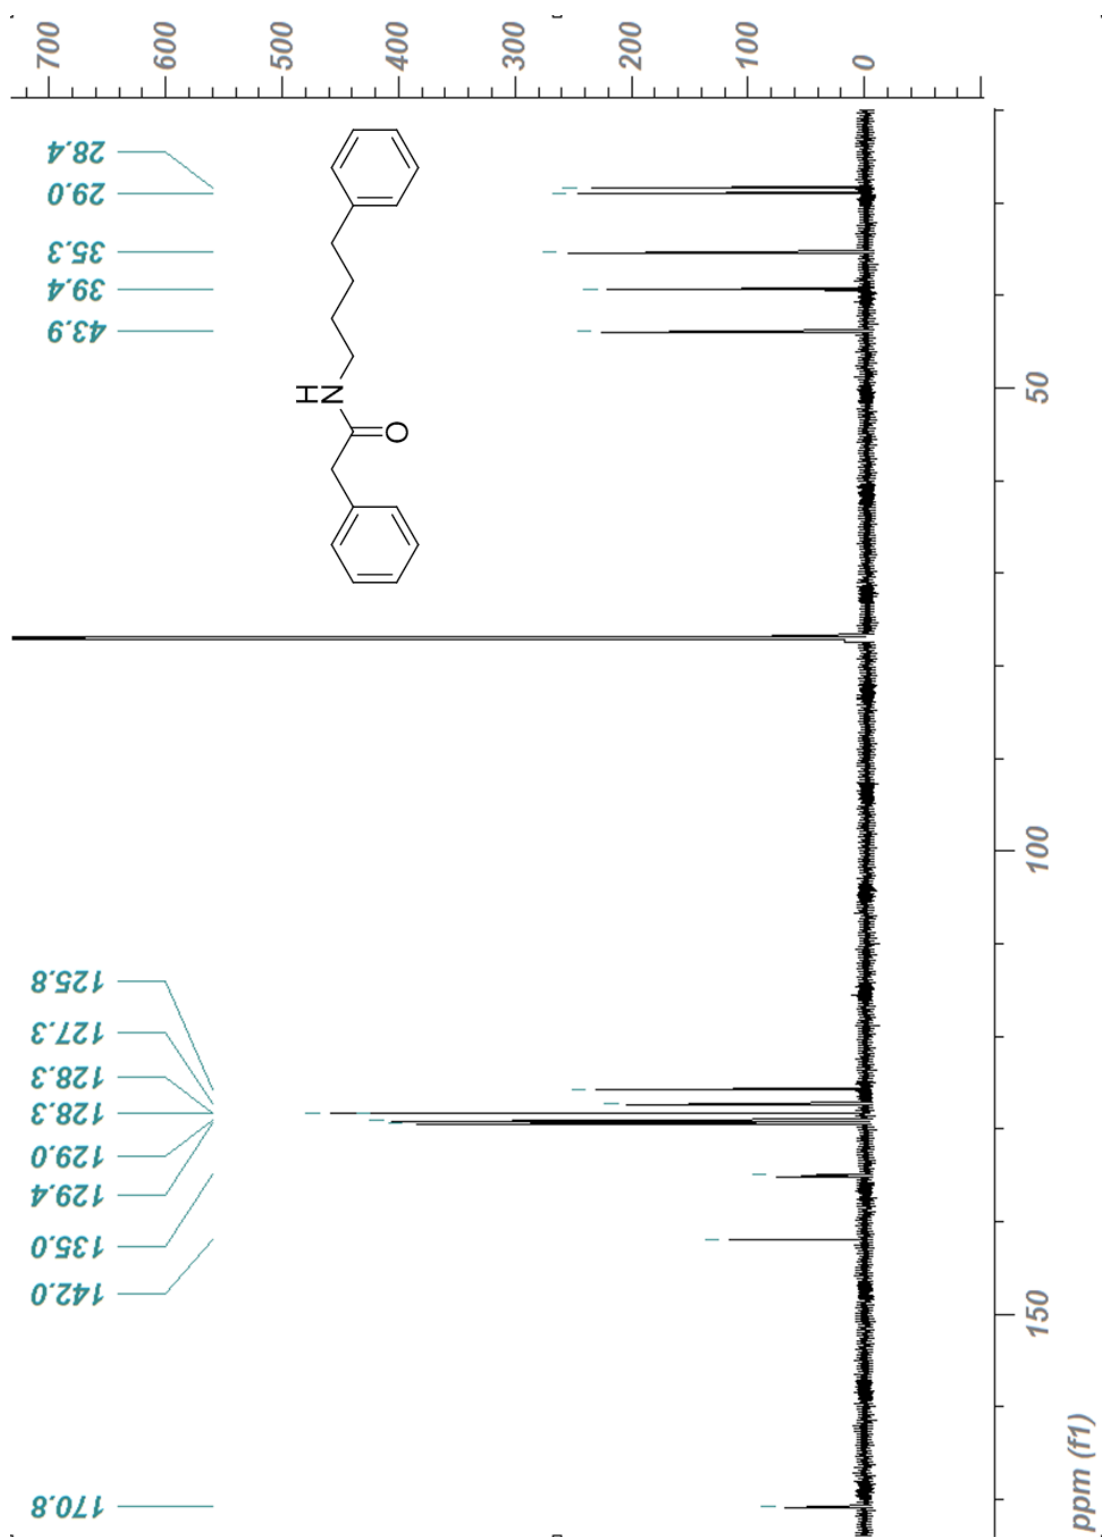

# GC chromatogram

## Chromatogram Plot

File: i:\am6-recrys 10-20-2011 12:13:33 pm.sms

Sample: AM6-Recrys

Scan Range: 1 - 3306 Time Range: 0.00 - 20.16 min.

MCOUNTS

Operator: KSN

Date: 20/10/2011 12:13

RIC 1 am6-recrys 10-20-2011 12:13:33 pm.sms 2000 CENTROID RAW

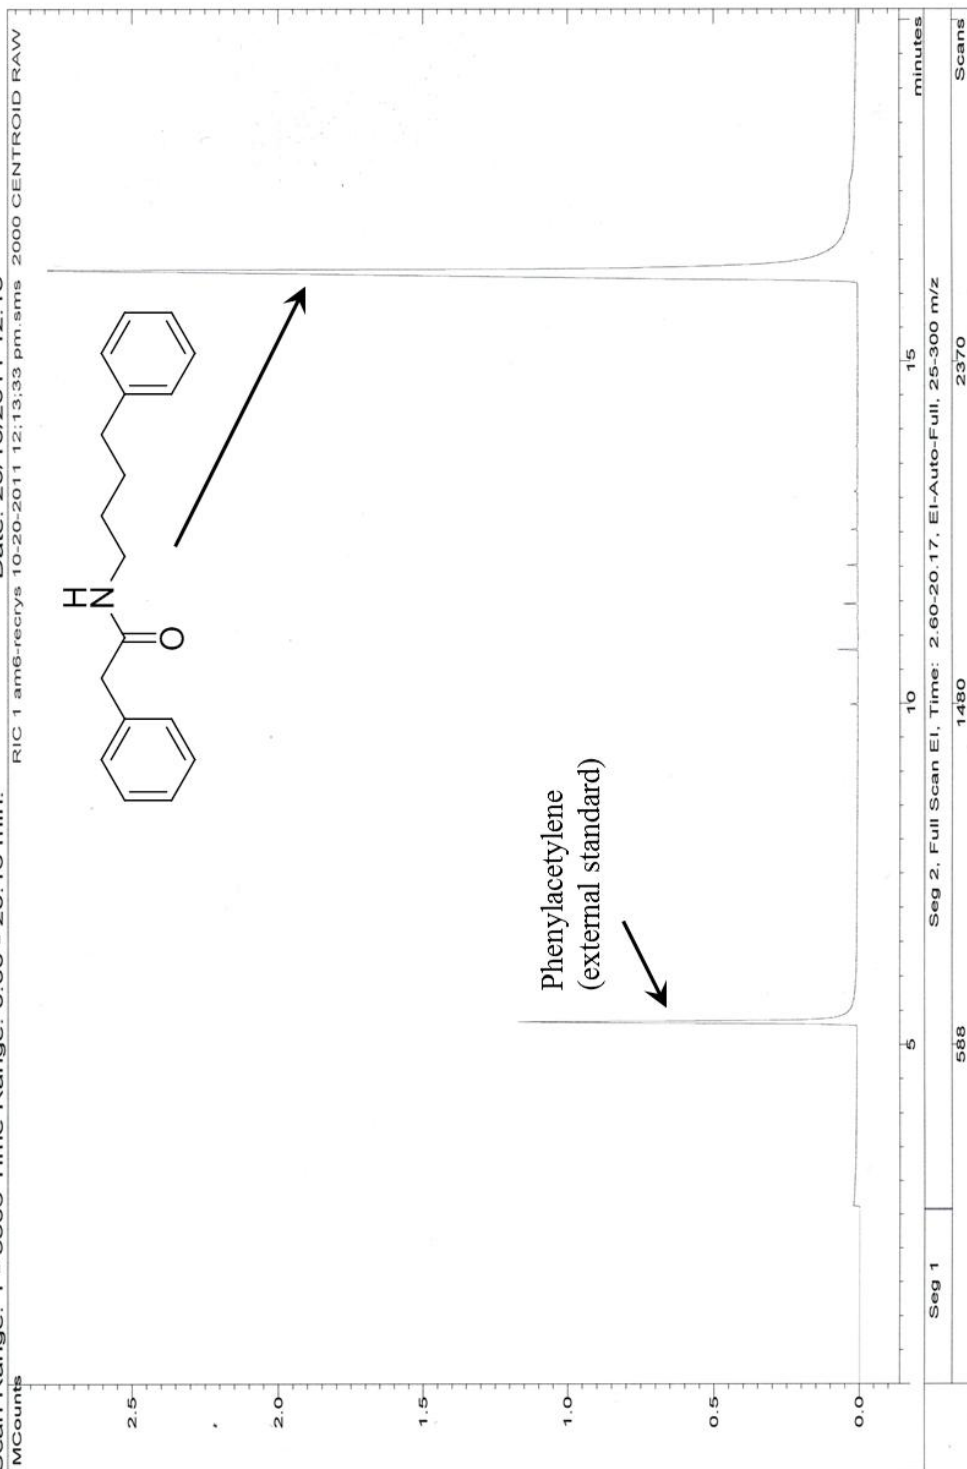

## Electrospray MS Results

1 mg of sample was diluted to 1 mL with acetonitrile. This was further diluted 1/100 in acetonitrile.

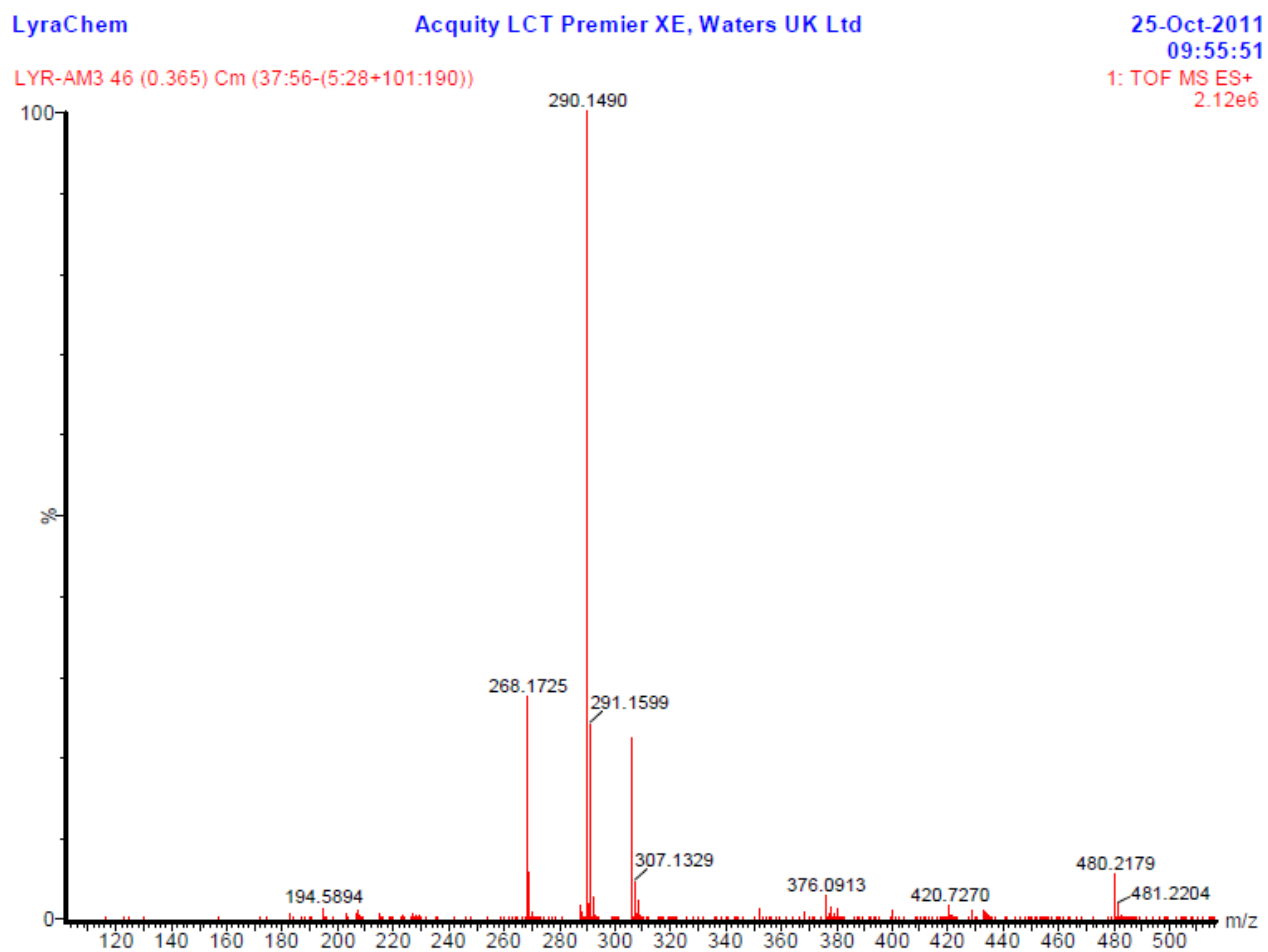

# Productivity Calculations for a Train of CSTR's and a Batch Reactor

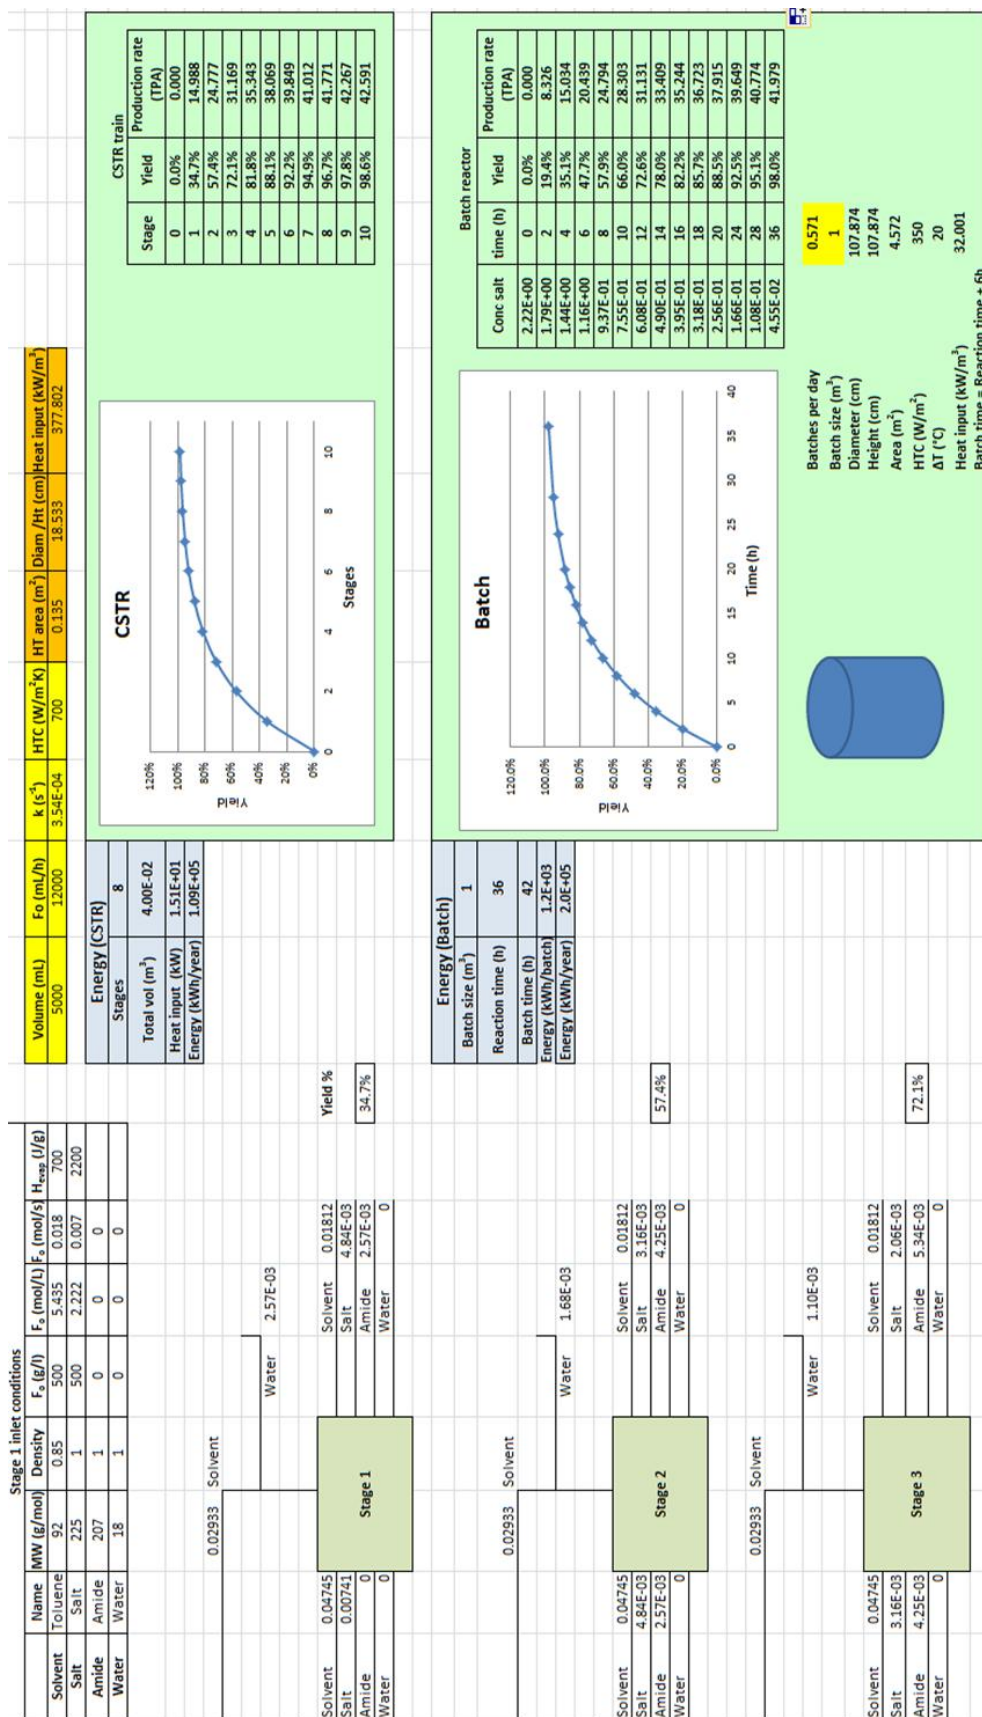

Supplement: Supplementary file 1 [file 4164826]
